# Supplementary material for: Metatranscriptomics reveals a differential temperature effect on the structural and functional organization of the anaerobic food web in rice field soil
Source: PubMed Central journal article supplement (PMC6147125; doi:10.1186/s40168-018-0546-9), 2018-09-19
Supplement: 40168_2018_546_MOESM1_ESM.pdf [file 40168_2018_546_MOESM1_ESM.pdf]

**Metatranscriptomics reveals a differential temperature effect on the structural and functional organization of the anaerobic food web in rice field soil**

Jingjing Peng<sup>1</sup>, Carl-Eric Wegner<sup>2</sup>, Qicheng Bei<sup>1</sup>, Pengfei Liu<sup>1</sup>, Werner Liesack<sup>1</sup>

**Supporting information:**

**Supplementary Figures 1-8, Supplementary Tables 1-10**

**Figure S1.** 16S rRNA dynamics of family-level groups affiliated with the different low-temperature (LM) modules (see co-occurrence network analysis for further details, Figure 1). Representative taxa shown in Figure 1 are bold-marked.

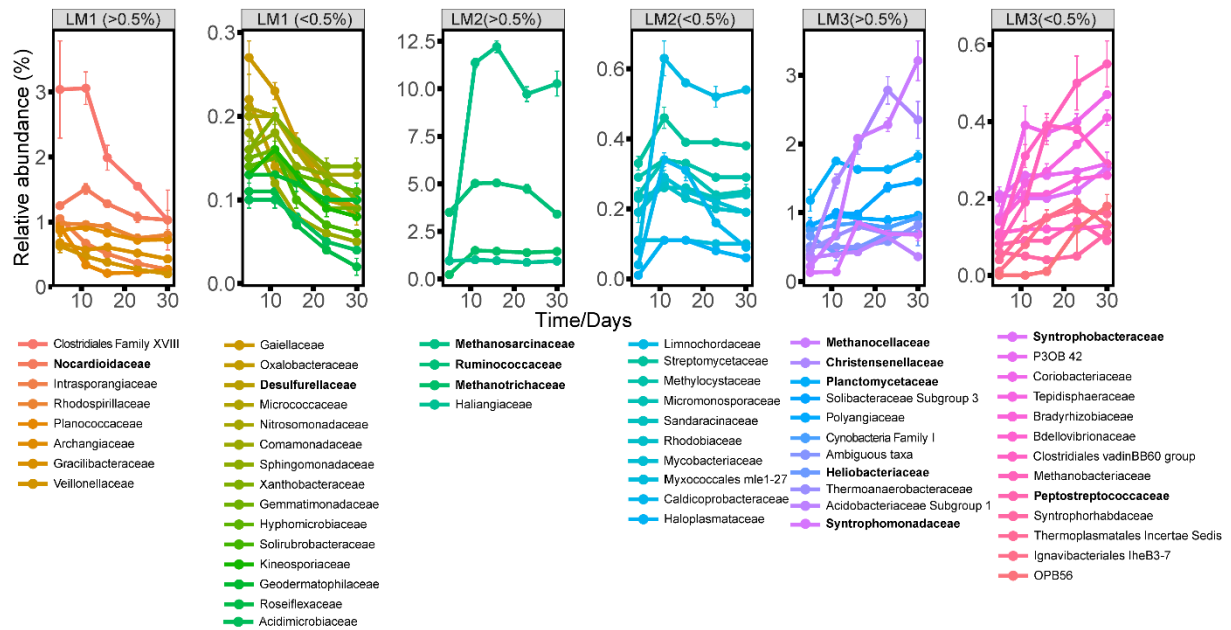

**Figure S2.** 16S rRNA dynamics of family-level groups affiliated with the different high-temperature (HM) modules (see co-occurrence network analysis for further details, Figure 1). Representative taxa shown in Figure 1 are bold-marked.

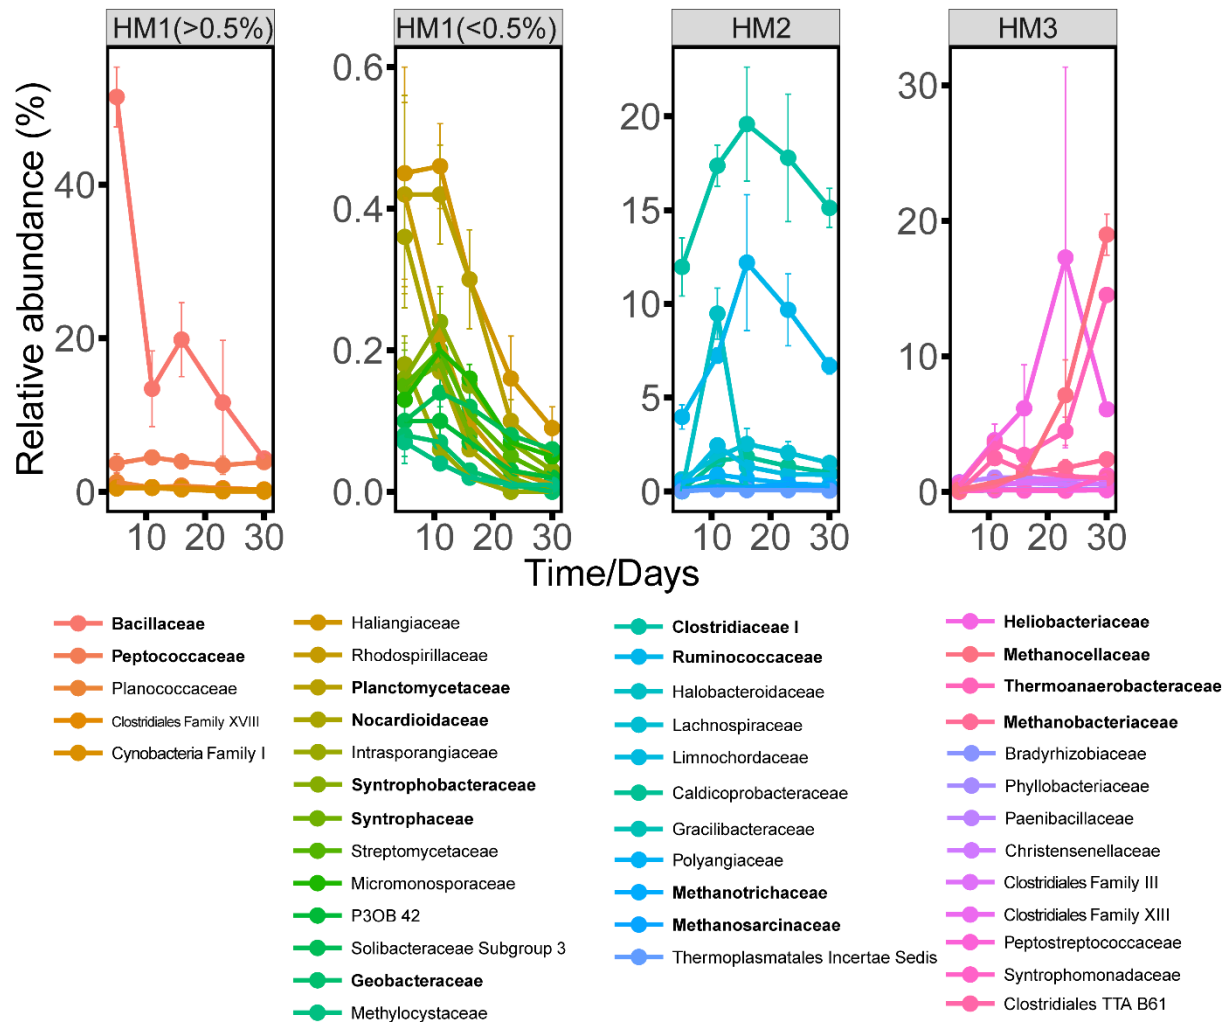

**Figure S3.** NMDS plots based on Bray-Curtis similarity matrices on 16S rRNA (**a**: family; **b**: phylum) and mRNA (**c**: family; **d**: phylum) levels at 30°C and 45°C.

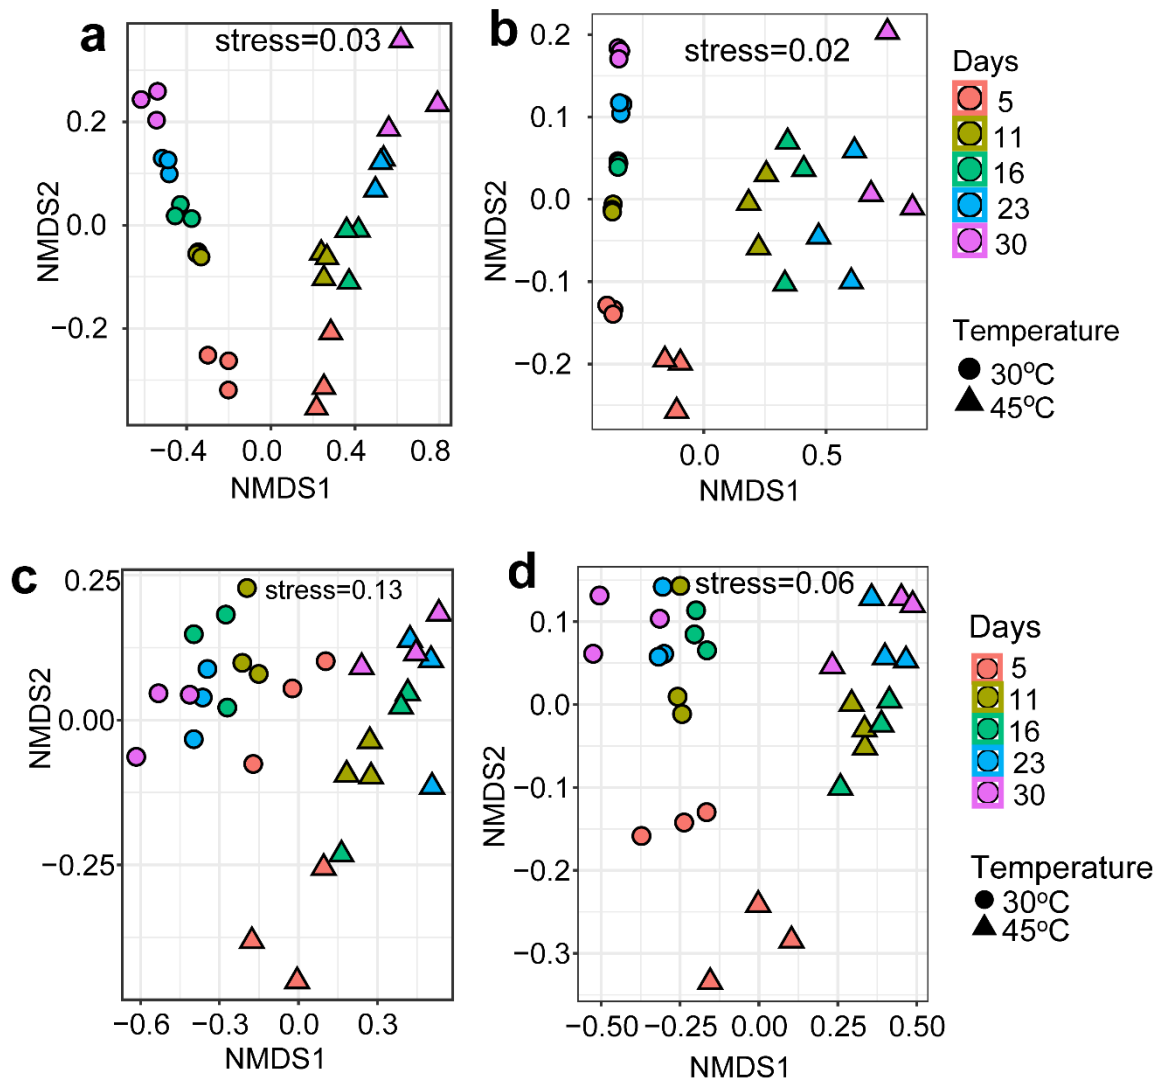

**Figure S4.** Taxonomic composition of metatranscriptomic data sets on 16S rRNA (**a**: phylum; **c**: family) and mRNA (**b**: phylum; **d**: family) (>1%) levels (means  $\pm$  SE, n=3).

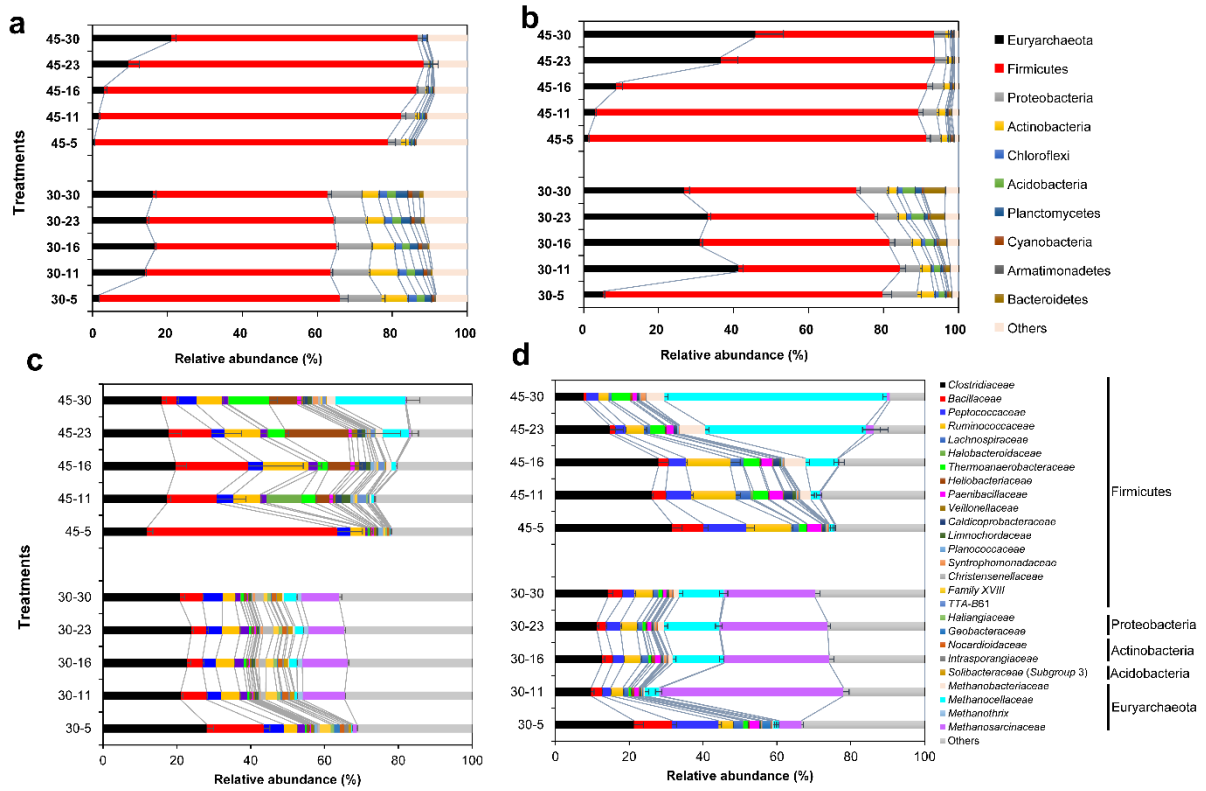

**Figure S5.** Family-level assignment of GH/CBM transcripts involved in the degradation of cellulose, xylan, other hemicelluloses, and chitin. Taxonomic assignments were done by homology-based assignment against NCBI/RefSeq using diamond and megan with its implemented lowest-common ancestor algorithm (a), and by applying the backwards search algorithm implemented in the Burrows-Wheeler-Transform for exact substring matching as the basis for taxonomic assignment of transcripts to degradation pathways (b) and key enzymes (cellulase, endo-1,4-beta-xylanase, alpha- and beta-galactosidases) in polymer breakdown (c). A detailed discussion of CAZymes involved in polymer breakdown is given in the Additional File 3, including a critical assessment of the taxonomic assignments of GH/CBM transcripts to methanogenic archaea.

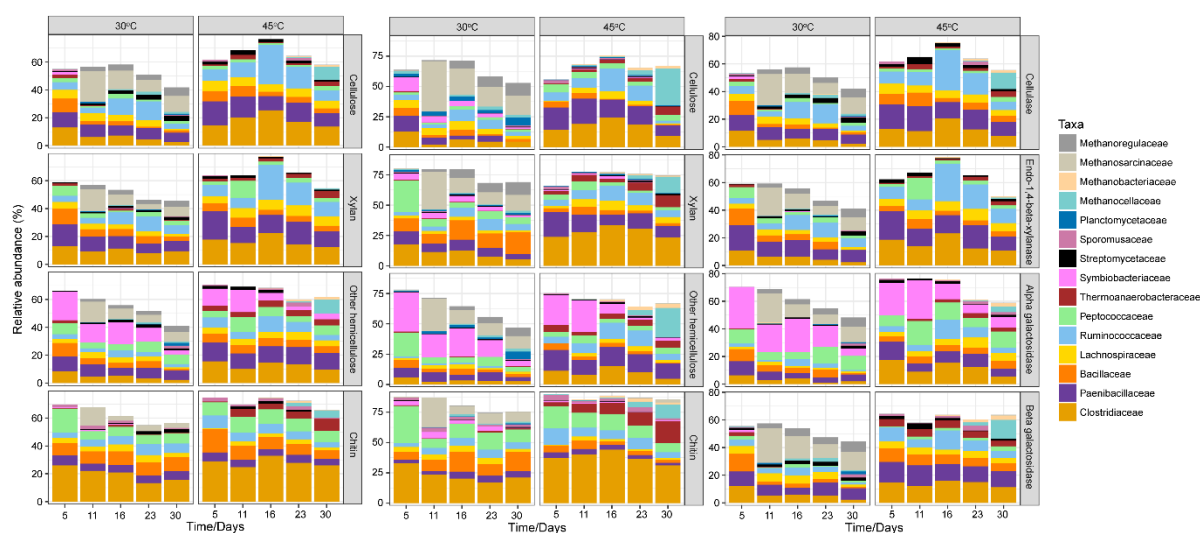

**Figure S6.** Abundance dynamics of mRNA affiliated with the KEGG category ‘propionate metabolism’ at 30°C and 45°C (upper panel), and the family-level mRNA dynamics (lower panels). The relative transcript abundances in family-level analysis relate to total mRNA reads affiliated with propionate metabolism (upper panel). Note that mRNA transcripts from replicate slurries (n = 3) were merged due to the low number of transcripts obtained for each sampling time point.

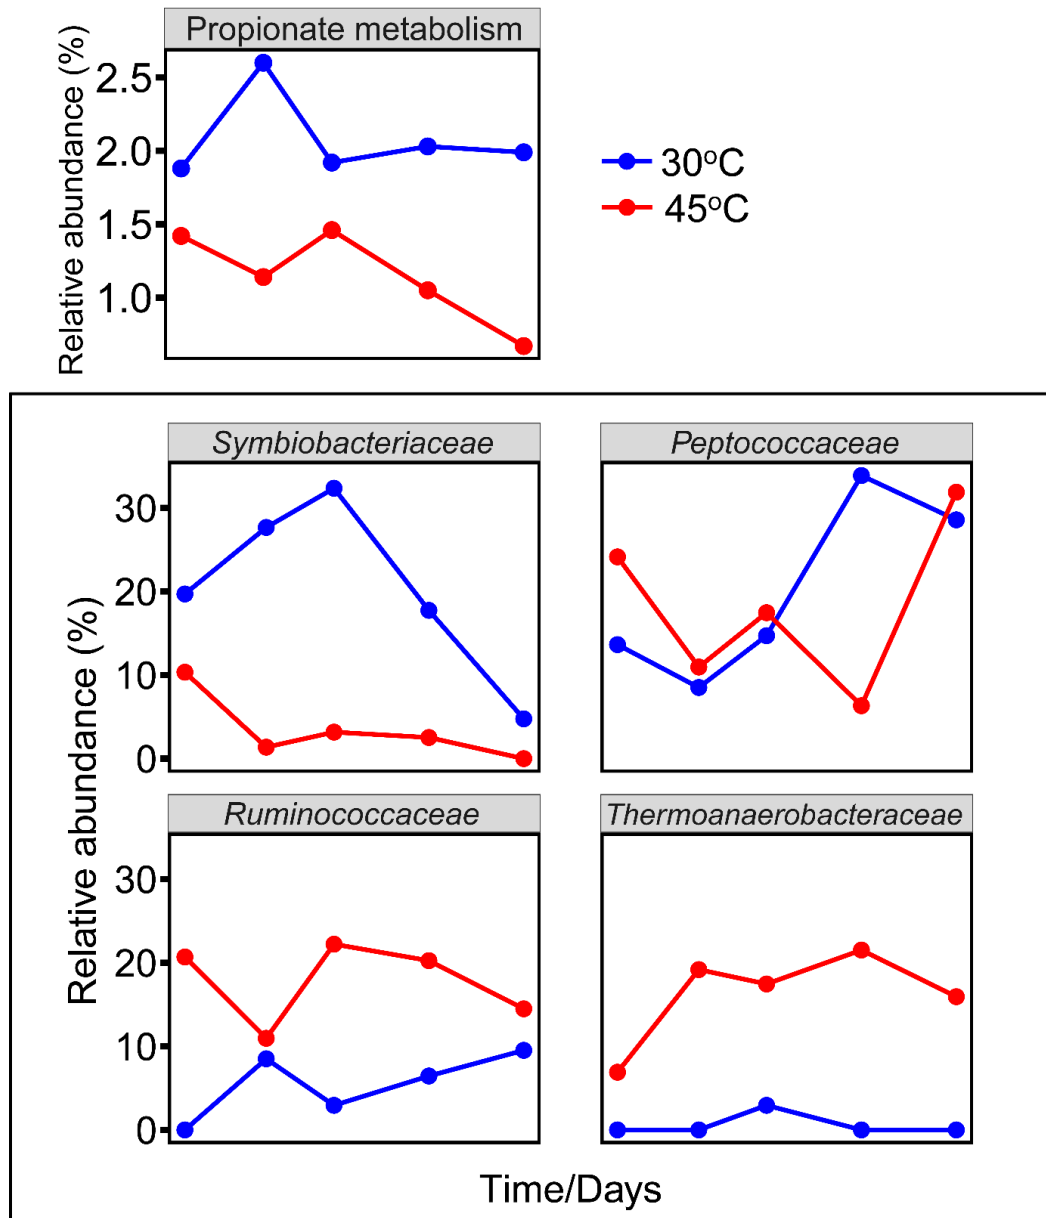

**Figure S7.** Transcript dynamics of individual genes involved in acetoclastic (ACE) or hydrogenotrophic (HYD) methanogenesis at 30°C and 45°C, according to the KEGG category ‘methane metabolism’. Acetoclastic methanogenesis: *mcrA*, Methyl coenzyme M reductase; ACDS, acetyl-CoA decarbonylase/synthase complex; *Ack*, acetate kinase; *Acs*, acetyl-CoA synthetase; *Pta*, phosphate acetyltransferase. Hydrogenotrophic methanogenesis: *Frh*, coenzyme F420 hydrogenase; *Mer*, 5-10-methylenetetrahydromethanopterin reductase; *Fwd*, formylmethanofuran dehydrogenase; *Ftr*, formylmethanofuran dehydrogenase; *Mch*, methenyltetrahydromethanopterin cyclohydrolase; *Mtd*, methylenetetrahydromethanopterin dehydrogenase.

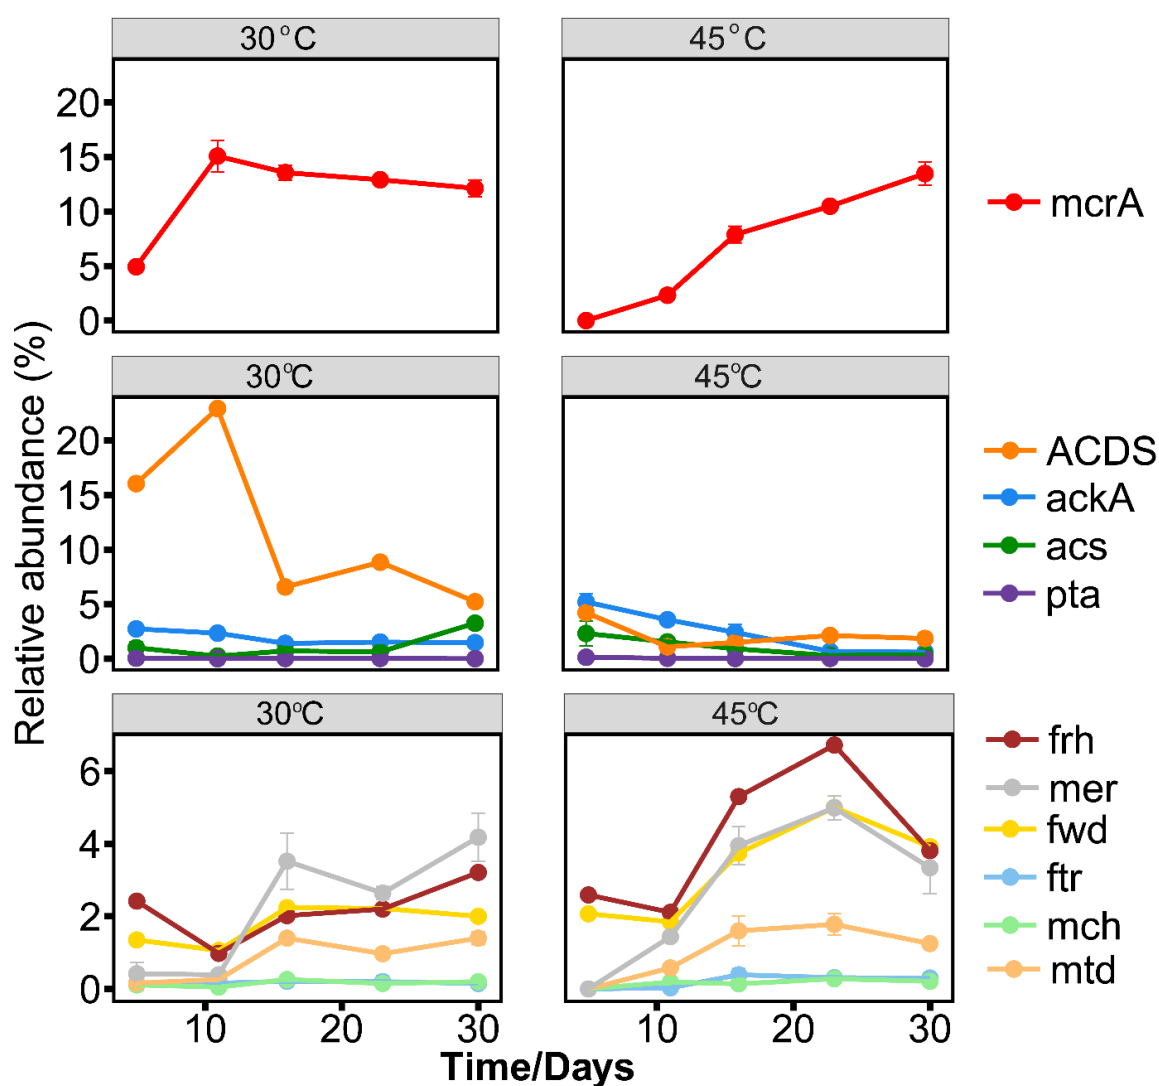



**Figure S8.** Abundance dynamics of transcripts encoding key functions (y-axis) in the KEGG category ‘methane metabolism’ in relation to different incubation time points at 30°C and 45°C (x-axis). The size of the circles indicates the relative transcript abundances of key enzymes in the mRNA datasets affiliated with the methane metabolism for *Methanosarcinaceae* (red; 30°C) and *Methanocellaceae* (blue; 45°C).

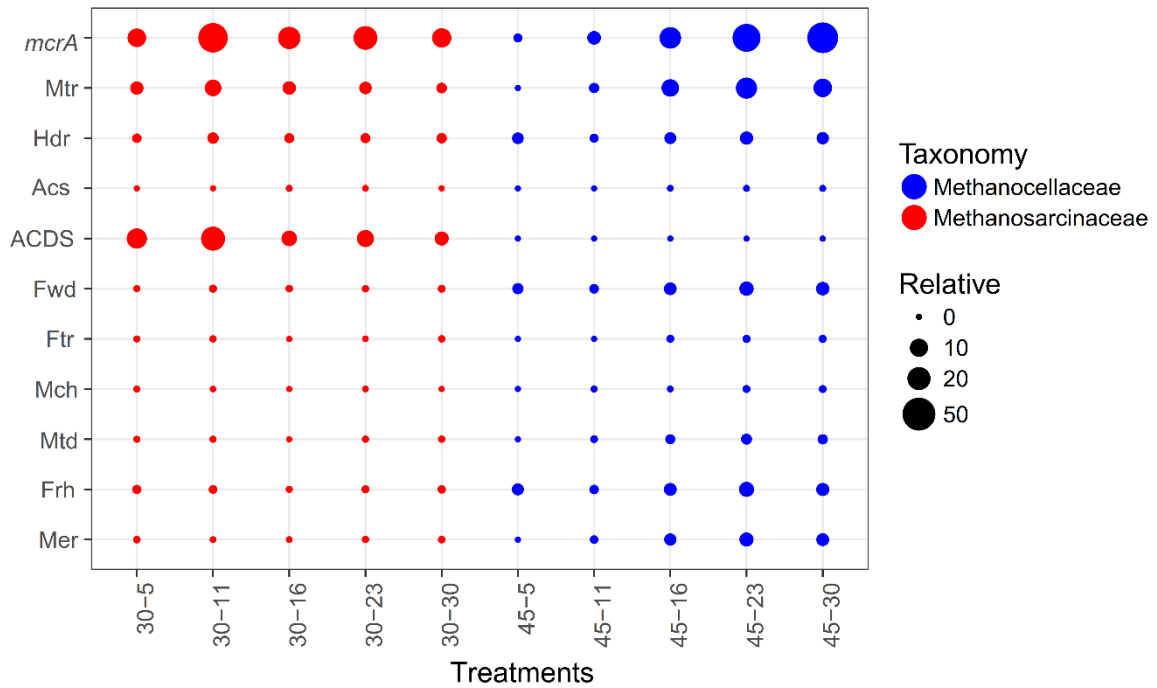

**Table S1.** Nodes information of 16S rRNA family-based network constructed for 30°C.

| Nodes |                     | Maximum relative                 |        |           |        |           |            |           |
|-------|---------------------|----------------------------------|--------|-----------|--------|-----------|------------|-----------|
| ID    | Class               | Family                           | Module | abundance | Degree | Pageranks | Clustering | Triangles |
| L1    | Acidimicrobiia      | Acidimicrobiaceae                | LM1    | 0.1       | 9      | 0.01      | 0.50       | 18        |
| L2    | Actinobacteria      | Geodermatophilaceae              | LM1    | 0.13      | 19     | 0.02      | 0.49       | 84        |
| L3    | Actinobacteria      | Intrasporangiaceae               | LM1    | 1.05      | 11     | 0.01      | 0.75       | 41        |
| L4    | Actinobacteria      | Kineosporiaceae                  | LM1    | 0.16      | 20     | 0.02      | 0.45       | 86        |
| L5    | Actinobacteria      | Micrococcaceae                   | LM1    | 0.21      | 11     | 0.01      | 0.76       | 42        |
| L6    | Actinobacteria      | <b>Nocardioideaceae</b>          | LM1    | 1.28      | 19     | 0.02      | 0.56       | 95        |
| L7    | Alphaproteobacteria | Hyphomicrobiaceae                | LM1    | 0.15      | 20     | 0.02      | 0.59       | 112       |
| L8    | Alphaproteobacteria | Rhodospirillaceae                | LM1    | 0.98      | 18     | 0.02      | 0.61       | 93        |
| L9    | Alphaproteobacteria | Sphingomonadaceae                | LM1    | 0.18      | 14     | 0.02      | 0.73       | 66        |
| L10   | Alphaproteobacteria | Xanthobacteraceae                | LM1    | 0.2       | 17     | 0.02      | 0.57       | 78        |
| L11   | Bacilli             | Planococcaceae                   | LM1    | 0.93      | 10     | 0.01      | 0.22       | 10        |
| L12   | Betaproteobacteria  | Comamonadaceae                   | LM1    | 0.12      | 12     | 0.01      | 0.59       | 39        |
| L13   | Betaproteobacteria  | Nitrosomonadaceae                | LM1    | 0.2       | 10     | 0.01      | 0.60       | 27        |
| L14   | Betaproteobacteria  | Oxalobacteraceae                 | LM1    | 0.22      | 12     | 0.01      | 0.73       | 48        |
| L15   | Chloroflexia        | Roseiflexaceae                   | LM1    | 0.11      | 8      | 0.01      | 0.64       | 18        |
| L16   | Clostridia          | Family.XVIII                     | LM1    | 3.06      | 15     | 0.02      | 0.73       | 77        |
| L17   | Clostridia          | Gracilibacteraceae               | LM1    | 0.68      | 2      | 0.00      | 0.00       | 0         |
| L18   | Deltaproteobacteria | Archangiaceae                    | LM1    | 0.92      | 21     | 0.02      | 0.48       | 100       |
| L19   | Deltaproteobacteria | <b>Desulfurellaceae</b>          | LM1    | 0.21      | 14     | 0.02      | 0.57       | 52        |
| L20   | Gemmatimonadetes    | Gemmatimonadaceae                | LM1    | 0.16      | 17     | 0.02      | 0.66       | 90        |
| L21   | Negativicutes       | Veillonellaceae                  | LM1    | 0.63      | 9      | 0.01      | 0.36       | 13        |
| L22   | Thermoleophilia     | Gaiellaceae                      | LM1    | 0.27      | 12     | 0.01      | 0.62       | 41        |
| L23   | Thermoleophilia     | Solirubrobacteraceae             | LM1    | 0.16      | 11     | 0.01      | 0.60       | 33        |
| L24   | Actinobacteria      | Micromonosporaceae               | LM2    | 0.34      | 9      | 0.01      | 0.36       | 13        |
| L25   | Actinobacteria      | Mycobacteriaceae                 | LM2    | 0.29      | 8      | 0.01      | 0.43       | 12        |
| L26   | Actinobacteria      | Streptomycetaceae                | LM2    | 0.46      | 8      | 0.01      | 0.57       | 16        |
| L27   | Alphaproteobacteria | Methylocystaceae                 | LM2    | 0.34      | 7      | 0.01      | 0.67       | 14        |
| L28   | Alphaproteobacteria | Rhodobiaceae                     | LM2    | 0.27      | 10     | 0.02      | 0.47       | 21        |
| L29   | Clostridia          | Caldicoprobacteraceae            | LM2    | 0.34      | 7      | 0.01      | 0.67       | 14        |
| L30   | Clostridia          | <b>Ruminococcaceae</b>           | LM2    | 5.05      | 8      | 0.01      | 0.64       | 18        |
| L31   | Deltaproteobacteria | Haliangiaceae                    | LM2    | 1.01      | 4      | 0.01      | 0.83       | 5         |
| L32   | Deltaproteobacteria | mle1.27                          | LM2    | 0.11      | 6      | 0.01      | 0.60       | 9         |
| L33   | Deltaproteobacteria | Sandaracinaceae                  | LM2    | 0.26      | 7      | 0.01      | 0.33       | 7         |
| L34   | Limnochordia        | Limnochordaceae                  | LM2    | 0.63      | 9      | 0.02      | 0.53       | 19        |
| L35   | Methanomicrobia     | <b>Methanosarcinaceae</b>        | LM2    | 12.21     | 7      | 0.01      | 0.76       | 16        |
| L36   | Methanomicrobia     | <b>Methanotrichaceae</b>         | LM2    | 1.5       | 1      | 0.00      | 0.00       | 0         |
| L37   | Mollicutes          | Haloplasmataceae                 | LM2    | 0.11      | 8      | 0.01      | 0.79       | 22        |
| L38   | Acidobacteria       | Acidobacteriaceae..Subgroup.1.   | LM3    | 0.64      | 4      | 0.01      | 0.83       | 5         |
| L39   | Alphaproteobacteria | Bradyrhizobiaceae                | LM3    | 0.26      | 13     | 0.02      | 0.51       | 40        |
| L40   | Chlorobia           | OPB56                            | LM3    | 0.18      | 9      | 0.02      | 0.75       | 27        |
| L41   | Clostridia          | <b>Christensenellaceae</b>       | LM3    | 2.78      | 9      | 0.02      | 0.53       | 19        |
| L42   | Clostridia          | Clostridiales.vadinBB60.group    | LM3    | 0.39      | 5      | 0.01      | 0.60       | 6         |
| L43   | Clostridia          | <b>Peptostreptococcaceae</b>     | LM3    | 0.14      | 6      | 0.01      | 0.73       | 11        |
| L44   | Clostridia          | <b>Syntrophomonadaceae</b>       | LM3    | 0.86      | 4      | 0.01      | 0.50       | 3         |
| L45   | Clostridia          | Heliobacteriaceae                | LM3    | 0.7       | 1      | 0.00      | 0.00       | 0         |
| L46   | Clostridia          | <b>Thermoanaerobacteraceae</b>   | LM3    | 0.8       | 2      | 0.01      | 1.00       | 1         |
| L47   | Coriobacteriia      | Coriobacteriaceae                | LM3    | 0.47      | 12     | 0.02      | 0.52       | 34        |
| L48   | Cyanobacteria       | FamilyI                          | LM3    | 0.93      | 7      | 0.02      | 0.57       | 12        |
| L49   | Deltaproteobacteria | P3OB.42                          | LM3    | 0.29      | 13     | 0.02      | 0.56       | 44        |
| L50   | Deltaproteobacteria | <b>Syntrophobacteraceae</b>      | LM3    | 0.28      | 8      | 0.02      | 0.61       | 17        |
| L51   | Deltaproteobacteria | Bdellovibrionaceae               | LM3    | 0.13      | 3      | 0.01      | 0.67       | 2         |
| L52   | Deltaproteobacteria | Polyangiaceae                    | LM3    | 0.96      | 7      | 0.01      | 0.62       | 13        |
| L53   | Deltaproteobacteria | <b>Syntrophorhabdaceae</b>       | LM3    | 0.11      | 2      | 0.01      | 1.00       | 1         |
| L54   | Ignavibacteria      | IheB3.7                          | LM3    | 0.19      | 11     | 0.02      | 0.40       | 22        |
| L55   | Methanobacteria     | <b>Methanobacteriaceae</b>       | LM3    | 0.55      | 8      | 0.02      | 0.57       | 16        |
| L56   | Methanomicrobia     | <b>Methanocellaceae</b>          | LM3    | 3.21      | 10     | 0.02      | 0.51       | 23        |
| L57   | OPB35 soil group    | Ambiguous_taxa                   | LM3    | 0.82      | 11     | 0.02      | 0.51       | 28        |
| L58   | Phycisphaerae       | Tepidisphaeraceae                | LM3    | 0.41      | 8      | 0.01      | 0.68       | 19        |
| L59   | Planctomycetacia    | Planctomycetaceae                | LM3    | 1.82      | 7      | 0.01      | 0.76       | 16        |
| L60   | Solibacteres        | Solibacteraceae..Subgroup.3.     | LM3    | 1.45      | 8      | 0.01      | 0.68       | 19        |
| L61   | Thermoplasmata      | Thermoplasmatales.Incertae.Sedis | LM3    | 0.17      | 3      | 0.01      | 1.00       | 3         |
| L62   | Anaerolineae        | Anaerolineaceae                  | LM4    | 0.58      | 4      | 0.02      | 0.00       | 0         |
| L63   | Bacilli             | Bacillaceae                      | LM4    | 15.4      | 1      | 0.01      | 0.00       | 0         |
| L64   | Bacilli             | Paenibacillaceae                 | LM4    | 0.66      | 1      | 0.01      | 0.00       | 0         |
| L65   | Clostridia          | Peptococcaceae                   | LM4    | 5.51      | 1      | 0.01      | 0.00       | 0         |
| L66   | Deltaproteobacteria | Geobacteraceae                   | LM4    | 1.56      | 2      | 0.01      | 0.00       | 0         |
| L67   | Clostridia          | Clostridiaceae.1                 | LM5    | 28.11     | 1      | 0.01      | 0.00       | 0         |
| L68   | Clostridia          | Family.XIII                      | LM5    | 0.3       | 1      | 0.01      | 0.00       | 0         |
| L69   | Clostridia          | Family.XI                        | LM6    | 0.33      | 1      | 0.01      | 0.00       | 0         |
| L70   | Clostridia          | Lachnospiraceae                  | LM6    | 2.43      | 1      | 0.01      | 0.00       | 0         |

**Table S2.** Nodes information of 16S rRNA family-based network constructed for 45°C.

| Nodes ID | Class                      | Family                           | Module | Maximum relative abundance | Degree | Pageranks | Clustering | Triangles |
|----------|----------------------------|----------------------------------|--------|----------------------------|--------|-----------|------------|-----------|
| H1       | Acidobacteria/Solibacteres | Solibacteraceae..Subgroup.3.     | HM1    | 0.89                       | 9      | 0.03      | 0.25       | 9         |
| H2       | Actinobacteria             | Intrasporangiaceae               | HM1    | 0.18                       | 7      | 0.03      | 0.05       | 1         |
| H3       | Actinobacteria             | Micromonosporaceae               | HM1    | 0.2                        | 7      | 0.03      | 0.24       | 5         |
| H4       | Actinobacteria             | <b>Nocardioideaceae</b>          | HM1    | 0.36                       | 6      | 0.02      | 0.00       | 0         |
| H5       | Actinobacteria             | Streptomycetaceae                | HM1    | 0.2                        | 8      | 0.03      | 0.14       | 4         |
| H6       | Alphaproteobacteria        | Methylocystaceae                 | HM1    | 0.07                       | 7      | 0.03      | 0.10       | 2         |
| H7       | Alphaproteobacteria        | Rhodospirillaceae                | HM1    | 0.42                       | 5      | 0.02      | 0.10       | 1         |
| H8       | Bacilli                    | Bacillaceae                      | HM1    | 15.4                       | 6      | 0.03      | 0.00       | 0         |
| H9       | Bacilli                    | Planococcaceae                   | HM1    | 1.28                       | 5      | 0.02      | 0.00       | 0         |
| H10      | Clostridia                 | Family.XVIII                     | HM1    | 0.63                       | 9      | 0.04      | 0.06       | 2         |
| H11      | Clostridia                 | <b>Peptococcaceae</b>            | HM1    | 4.49                       | 3      | 0.01      | 0.33       | 1         |
| H12      | Cyanobacteria              | FamilyI                          | HM1    | 0.51                       | 1      | 0.01      | 0.00       | 0         |
| H13      | Deltaproteobacteria        | <b>Geobacteraceae</b>            | HM1    | 0.08                       | 6      | 0.02      | 0.00       | 0         |
| H14      | Deltaproteobacteria        | Haliangiaceae                    | HM1    | 0.46                       | 1      | 0.01      | 0.00       | 0         |
| H15      | Deltaproteobacteria        | P3OB.42                          | HM1    | 0.1                        | 6      | 0.02      | 0.27       | 4         |
| H16      | Deltaproteobacteria        | <b>Syntrophaceae</b>             | HM1    | 0.18                       | 1      | 0.01      | 0.00       | 0         |
| H17      | Deltaproteobacteria        | <b>Syntrophobacteraceae</b>      | HM1    | 0.24                       | 7      | 0.03      | 0.00       | 0         |
| H18      | Planctomycetacia           | <b>Planctomycetaceae</b>         | HM1    | 0.42                       | 3      | 0.01      | 0.00       | 0         |
| H19      | Clostridia                 | Caldicoprobacteraceae            | HM2    | 0.34                       | 17     | 0.05      | 0.34       | 46        |
| H20      | Clostridia                 | Clostridiaceae.1                 | HM2    | 28.11                      | 11     | 0.03      | 0.33       | 18        |
| H21      | Clostridia                 | Gracilibacteraceae               | HM2    | 0.54                       | 9      | 0.03      | 0.58       | 21        |
| H22      | Clostridia                 | Halobacteroidaceae               | HM2    | 9.48                       | 7      | 0.02      | 0.76       | 16        |
| H23      | Clostridia                 | Lachnospiraceae                  | HM2    | 2.53                       | 9      | 0.03      | 0.69       | 25        |
| H24      | Clostridia                 | Limnochordaceae                  | HM2    | 2.45                       | 9      | 0.03      | 0.53       | 19        |
| H25      | Clostridia                 | <b>Ruminococcaceae</b>           | HM2    | 12.2                       | 7      | 0.02      | 0.43       | 9         |
| H26      | Deltaproteobacteria        | Polyangiaceae                    | HM2    | 0.89                       | 8      | 0.02      | 0.36       | 10        |
| H27      | Methanomicrobia            | <b>Methanotrichaceae</b>         | HM2    | 0.13                       | 11     | 0.03      | 0.29       | 16        |
| H28      | Methanomicrobia            | <b>Methanosarcinaceae</b>        | HM2    | 0.38                       | 3      | 0.01      | 0.67       | 2         |
| H29      | Thermoplasmata             | Thermoplasmatales.Incertae.Sedis | HM2    | 0.09                       | 7      | 0.02      | 0.71       | 15        |
| H30      | Alphaproteobacteria        | Bradyrhizobiaceae                | HM3    | 0.15                       | 9      | 0.03      | 0.47       | 17        |
| H31      | Alphaproteobacteria        | Phyllobacteriaceae               | HM3    | 0.21                       | 10     | 0.03      | 0.56       | 25        |
| H32      | Bacilli                    | Paenibacillaceae                 | HM3    | 1.05                       | 11     | 0.03      | 0.45       | 25        |
| H33      | Clostridia                 | <b>Christensenellaceae</b>       | HM3    | 0.64                       | 18     | 0.05      | 0.37       | 57        |
| H34      | Clostridia                 | Family.III                       | HM3    | 0.97                       | 8      | 0.02      | 0.46       | 13        |
| H35      | Clostridia                 | Family.XIII                      | HM3    | 0.17                       | 13     | 0.03      | 0.50       | 39        |
| H36      | Clostridia                 | <b>Helioacteriaceae</b>          | HM3    | 17.29                      | 2      | 0.01      | 1.00       | 1         |
| H37      | Clostridia                 | <b>Peptostreptococcaceae</b>     | HM3    | 0.15                       | 8      | 0.02      | 0.71       | 20        |
| H38      | Clostridia                 | <b>Syntrophomonadaceae</b>       | HM3    | 1.23                       | 10     | 0.03      | 0.67       | 30        |
| H39      | Clostridia                 | <b>Thermoanaerobacteraceae</b>   | HM3    | 14.53                      | 9      | 0.03      | 0.64       | 23        |
| H40      | Clostridia                 | TTA.B61                          | HM3    | 2.48                       | 7      | 0.02      | 0.81       | 17        |
| H41      | Methanobacteria            | <b>Methanobacteriaceae</b>       | HM3    | 2.39                       | 5      | 0.02      | 0.60       | 6         |
| H42      | Methanomicrobia            | <b>Methanocellaceae</b>          | HM3    | 18.98                      | 5      | 0.02      | 0.80       | 8         |

**Table S3.** Mean numbers and percentages (n = 3) of CAZyme transcripts that could be assigned on phylum and family levels at five sampling time points and two temperatures (30°C vs. 45°C).

|              | Cellulose |            |            | Xylan  |            |            | Other hemicelluloses |            |            | Chitin |            |            |
|--------------|-----------|------------|------------|--------|------------|------------|----------------------|------------|------------|--------|------------|------------|
|              | Number    | Phylum (%) | Family (%) | Number | Phylum (%) | Family (%) | Number               | Phylum (%) | Family (%) | Number | Phylum (%) | Family (%) |
| <b>30-5</b>  | 176       | 96.03      | 77.73      | 335    | 97.40      | 81.15      | 400                  | 96.93      | 80         | 707    | 98.13      | 85.02      |
| <b>30-11</b> | 237       | 97.09      | 77.56      | 412    | 96.55      | 76.96      | 448                  | 96.33      | 76.58      | 505    | 97.13      | 81.56      |
| <b>30-16</b> | 185       | 95.02      | 74.85      | 359    | 96.44      | 74.38      | 364                  | 96.60      | 70.57      | 412    | 96.57      | 76.89      |
| <b>30-23</b> | 260       | 94.12      | 66.43      | 469    | 94.71      | 69.93      | 437                  | 95.75      | 63.39      | 488    | 96.14      | 76.27      |
| <b>30-30</b> | 180       | 95.95      | 65.25      | 319    | 96.93      | 69.80      | 345                  | 95.19      | 57.27      | 377    | 98.01      | 75.04      |
| <b>45-5</b>  | 131       | 96.71      | 83.79      | 302    | 98.19      | 81.10      | 293                  | 97.74      | 85.68      | 514    | 99.13      | 87.10      |
| <b>45-11</b> | 561       | 96.88      | 76.55      | 1107   | 97.15      | 80.04      | 974                  | 97.73      | 84.1       | 1667   | 98.21      | 80.29      |
| <b>45-16</b> | 956       | 98.26      | 89.09      | 1089   | 97.57      | 85.57      | 688                  | 97.46      | 80.65      | 1260   | 98.37      | 80.85      |
| <b>45-23</b> | 649       | 96.97      | 83.53      | 981    | 97.24      | 81.68      | 787                  | 97.70      | 79.16      | 1593   | 98.52      | 81.54      |
| <b>45-30</b> | 662       | 97.42      | 80.71      | 972    | 95.84      | 80.72      | 950                  | 96.60      | 79.51      | 1595   | 97.93      | 80.44      |

**Table S4.** Mean numbers (n = 3) of transcripts encoding key enzymes of plant polymer breakdown, which could be assigned on family level. Numbers are given in relation to five sampling time points for 30°C and 45°C.

|              | <b>Cellulase</b> | <b>Endo-1,4-beta-xylanase</b> | <b>Alpha-galactosidase</b> | <b>Beta-galactosidase</b> |
|--------------|------------------|-------------------------------|----------------------------|---------------------------|
| <b>30-5</b>  | 98               | 139                           | 139                        | 76                        |
| <b>30-11</b> | 148              | 157                           | 146                        | 125                       |
| <b>30-16</b> | 102              | 115                           | 113                        | 81                        |
| <b>30-23</b> | 127              | 143                           | 119                        | 95                        |
| <b>30-30</b> | 90               | 86                            | 76                         | 73                        |
| <b>45-5</b>  | 71               | 108                           | 78                         | 73                        |
| <b>45-11</b> | 192              | 316                           | 268                        | 200                       |
| <b>45-16</b> | 321              | 303                           | 133                        | 167                       |
| <b>45-23</b> | 291              | 320                           | 160                        | 222                       |
| <b>45-30</b> | 273              | 272                           | 189                        | 238                       |

**Table S5.** mRNA abundances related to acetoclastic and hydrogenotrophic methanogenesis.

| Days | 30°C                  |                                              |                                                  | 45°C                  |                                              |                                                  |
|------|-----------------------|----------------------------------------------|--------------------------------------------------|-----------------------|----------------------------------------------|--------------------------------------------------|
|      | Avg. No. <sup>1</sup> | Acetoclastic methanogenesis (%) <sup>2</sup> | Hydrogenotrophic methanogenesis (%) <sup>2</sup> | Avg. No. <sup>1</sup> | Acetoclastic methanogenesis (%) <sup>2</sup> | Hydrogenotrophic methanogenesis (%) <sup>2</sup> |
| 5    | 143±7                 | 63.74±12.70                                  | 36.26±12.70                                      | 7±1                   | 0.00                                         | 0.00                                             |
| 11   | 1461±55               | 61.32±1.21                                   | 38.68±1.21                                       | 64±2                  | 1.23±2.14                                    | 98.77±2.14                                       |
| 16   | 773±28                | 23.67±0.25                                   | 76.33±0.25                                       | 377±92                | 0.24±0.42                                    | 99.76±0.42                                       |
| 23   | 993±100               | 36.84±3.16                                   | 63.16±3.16                                       | 4541±592              | 1.58±2.20                                    | 98.42±2.20                                       |
| 30   | 301±41                | 24.45±4.19                                   | 75.55±4.19                                       | 7030±246              | 0.04±0.06                                    | 99.96±0.06                                       |

<sup>1</sup>The average numbers of mRNA reads that could be assigned to GO biological processes.

<sup>2</sup>The calculation of mRNA transcript abundances related to acetoclastic and hydrogenotrophic methanogenesis was done as described previously [1]. Briefly, ID numbers of mRNA assigned to methanogenesis (based on SEED subsystems) were extracted from MEGAN6. The corresponding reads were extracted from mRNA fasta files by Python scripts. Respective subdatasets of methanogenesis-affiliated mRNA were queried against UNIREF90 [2] using the same search parameters as above. Resulting BLAST outputs were mapped against Gene Ontology database (GO, <http://www.geneontology.org/>). Mappings from UniRef90 to GO were done using available ID mappings (<http://www.uniprot.org/downloads>), which were stored as an indexed sqlite3 file to speed up database queries for mapping. Mapping was done by parsing the BLAST output with custom python scripts. GO terms of interest included "methanogenesis" (GO: 0015948), "methanogenesis from acetate" (GO:0019385), "methanogenesis from CO<sub>2</sub>" (GO:0019386) and "methanogenesis from methanol" (GO:0019387).

**Table S6.** Sequencing statistics of 16S rRNA and 18S rRNA in metatranscriptomic datasets.

|                | Number of raw reads | Processed reads <sup>1</sup> | Mean length | 16S rRNA   | % processed reads | Phylum     | % assigned 16S rRNA reads <sup>2</sup> | Family     | % assigned 16S rRNA reads <sup>3</sup> | 18S rRNA  | % processed reads |
|----------------|---------------------|------------------------------|-------------|------------|-------------------|------------|----------------------------------------|------------|----------------------------------------|-----------|-------------------|
| <b>30-5-1</b>  | 5,157,486           | 2,856,173                    | 269         | 1,271,937  | 44.38             | 1,115,370  | 87.69                                  | 1,078,411  | 84.78                                  | 39,986    | 1.40              |
| <b>30-5-2</b>  | 4,898,199           | 2,546,808                    | 270         | 1,153,298  | 45.13             | 990,525    | 85.89                                  | 960,511    | 83.28                                  | 33,618    | 1.32              |
| <b>30-5-3</b>  | 5,567,775           | 3,053,755                    | 268         | 1,283,983  | 41.90             | 1,123,762  | 87.52                                  | 1,092,079  | 85.05                                  | 36,034    | 1.18              |
| <b>30-11-1</b> | 5,841,253           | 2,830,631                    | 264         | 1,161,423  | 41.03             | 1,043,591  | 89.85                                  | 1,009,340  | 86.91                                  | 48,970    | 1.73              |
| <b>30-11-2</b> | 3,837,685           | 2,227,500                    | 275         | 974,645    | 43.76             | 874,327    | 89.71                                  | 844,602    | 86.66                                  | 34,749    | 1.56              |
| <b>30-11-3</b> | 4,935,749           | 2,725,427                    | 275         | 1,192,535  | 43.76             | 1,070,545  | 89.77                                  | 1,033,060  | 86.63                                  | 38,974    | 1.43              |
| <b>30-16-1</b> | 4,471,932           | 2,460,365                    | 265         | 1,032,737  | 41.97             | 933,510    | 90.39                                  | 902,724    | 87.41                                  | 42,072    | 1.71              |
| <b>30-16-2</b> | 4,680,086           | 2,584,457                    | 269         | 1,081,607  | 41.85             | 976,598    | 90.29                                  | 944,966    | 87.37                                  | 46,262    | 1.79              |
| <b>30-16-3</b> | 4,295,407           | 2,462,277                    | 273         | 1,039,666  | 42.22             | 936,865    | 90.11                                  | 906,317    | 87.17                                  | 46,045    | 1.87              |
| <b>30-23-1</b> | 4,217,125           | 2,425,631                    | 277         | 977,834    | 40.31             | 874,862    | 89.47                                  | 845,160    | 86.43                                  | 60,156    | 2.48              |
| <b>30-23-2</b> | 3,678,228           | 2,154,501                    | 281         | 879,928    | 40.84             | 786,955    | 89.43                                  | 759,416    | 86.30                                  | 50,631    | 2.35              |
| <b>30-23-3</b> | 5,804,136           | 3,221,256                    | 268         | 1,312,790  | 40.75             | 1,169,184  | 89.06                                  | 1,126,848  | 85.84                                  | 70,223    | 2.18              |
| <b>30-30-1</b> | 4,174,218           | 2,327,420                    | 275         | 1,096,239  | 47.10             | 978,445    | 89.25                                  | 940,964    | 85.84                                  | 64,470    | 2.77              |
| <b>30-30-2</b> | 3,908,117           | 2,167,254                    | 269         | 1,014,124  | 46.79             | 904,203    | 89.16                                  | 871,763    | 85.96                                  | 63,067    | 2.91              |
| <b>30-30-3</b> | 5,068,017           | 2,836,755                    | 276         | 1,359,766  | 47.93             | 1,216,284  | 89.45                                  | 1,171,280  | 86.14                                  | 79,429    | 2.80              |
| <b>45-5-1</b>  | 3,704,178           | 2,238,540                    | 279         | 986,359    | 43.92             | 832,403    | 84.39                                  | 815,064    | 82.63                                  | 43,204    | 1.93              |
| <b>45-5-2</b>  | 4,311,769           | 2,620,347                    | 284         | 1,160,016  | 44.12             | 980,055    | 84.49                                  | 966,487    | 83.32                                  | 47,952    | 1.83              |
| <b>45-5-3</b>  | 3,810,324           | 2,203,865                    | 274         | 948,596    | 42.89             | 811,919    | 85.59                                  | 792,515    | 83.55                                  | 41,212    | 1.87              |
| <b>45-11-1</b> | 3,450,734           | 2,202,296                    | 284         | 898,866    | 40.69             | 783,834    | 87.20                                  | 722,747    | 80.41                                  | 39,421    | 1.79              |
| <b>45-11-2</b> | 3,698,776           | 2,247,423                    | 281         | 1,007,074  | 44.67             | 877,938    | 87.18                                  | 834,671    | 82.88                                  | 33,487    | 1.49              |
| <b>45-11-3</b> | 4,236,734           | 2,563,393                    | 282         | 1,053,962  | 40.99             | 915,902    | 86.90                                  | 858,476    | 81.45                                  | 46,397    | 1.81              |
| <b>45-16-1</b> | 4,940,751           | 3,193,179                    | 282         | 1,375,518  | 42.96             | 1,234,278  | 89.73                                  | 1,157,170  | 84.13                                  | 59,393    | 1.86              |
| <b>45-16-2</b> | 4,182,105           | 2,348,243                    | 274         | 1,236,052  | 52.41             | 1,081,836  | 87.52                                  | 1,051,450  | 85.07                                  | 28,179    | 1.20              |
| <b>45-16-3</b> | 4,022,571           | 2,518,427                    | 281         | 1,115,953  | 44.17             | 1,001,756  | 89.77                                  | 937,576    | 84.02                                  | 47,850    | 1.90              |
| <b>45-23-1</b> | 3,854,992           | 2,475,424                    | 284         | 1,152,296  | 46.38             | 1,015,314  | 88.11                                  | 985,121    | 85.49                                  | 35,399    | 1.43              |
| <b>45-23-2</b> | 4,832,386           | 3,071,109                    | 282         | 1,518,034  | 49.30             | 1,344,176  | 88.55                                  | 1,302,786  | 85.82                                  | 39,617    | 1.29              |
| <b>45-23-3</b> | 4,514,183           | 2,864,927                    | 280         | 1,372,265  | 47.75             | 1,243,508  | 90.62                                  | 1,220,824  | 88.96                                  | 40,968    | 1.43              |
| <b>45-30-1</b> | 3,765,434           | 2,420,768                    | 282         | 1,141,068  | 46.96             | 984,071    | 86.24                                  | 965,689    | 84.63                                  | 24,692    | 1.02              |
| <b>45-30-2</b> | 5,130,372           | 3,241,492                    | 279         | 1,448,868  | 44.55             | 1,314,697  | 90.74                                  | 1,279,181  | 88.29                                  | 47,002    | 1.45              |
| <b>45-30-3</b> | 4,058,488           | 2,576,315                    | 284         | 1,211,190  | 46.85             | 1,037,697  | 85.68                                  | 1,009,741  | 83.37                                  | 31,946    | 1.24              |
| <b>Total</b>   | 133,049,210         | 77,665,958                   |             | 34,458,629 |                   | 30,454,410 |                                        | 29,386,939 |                                        | 1,361,405 |                   |

<sup>1</sup> Average number (n=3) of quality-filtered and merged reads of 269-291 bp length.

<sup>2,3</sup> Average percentage (n=3) of bacterial and archaeal 16S rRNA reads that could be assigned on phylum and family levels.

**Table S7.** Domain-level distribution of SSU rRNA reads (means  $\pm$  SE, n=3).

|              | <b>Archaea</b>   | <b>Bacteria</b>  | <b>Eukaryota</b> | <b>Others</b>    |
|--------------|------------------|------------------|------------------|------------------|
| <b>30-5</b>  | 1.91 $\pm$ 0.24  | 90.56 $\pm$ 0.46 | 1.07 $\pm$ 0.11  | 6.45 $\pm$ 0.31  |
| <b>30-11</b> | 13.82 $\pm$ 0.29 | 78.92 $\pm$ 0.62 | 1.74 $\pm$ 0.25  | 5.52 $\pm$ 0.25  |
| <b>30-16</b> | 16.48 $\pm$ 0.39 | 75.8 $\pm$ 0.32  | 2.3 $\pm$ 0.091  | 5.41 $\pm$ 0.03  |
| <b>30-23</b> | 14.34 $\pm$ 0.55 | 76.86 $\pm$ 0.74 | 3.21 $\pm$ 0.22  | 5.58 $\pm$ 0.14  |
| <b>30-30</b> | 16.06 $\pm$ 0.84 | 74.67 $\pm$ 0.76 | 3.45 $\pm$ 0.12  | 5.82 $\pm$ 0.09  |
| <b>45-5</b>  | 0.63 $\pm$ 0.20  | 89.60 $\pm$ 0.31 | 0.49 $\pm$ 0.22  | 9.28 $\pm$ 0.33  |
| <b>45-11</b> | 1.78 $\pm$ 0.26  | 86.02 $\pm$ 0.87 | 0.96 $\pm$ 0.20  | 11.24 $\pm$ 0.48 |
| <b>45-16</b> | 3.19 $\pm$ 0.68  | 86.80 $\pm$ 0.93 | 0.72 $\pm$ 0.28  | 9.30 $\pm$ 0.41  |
| <b>45-23</b> | 9.89 $\pm$ 3.09  | 79.72 $\pm$ 3.83 | 0.30 $\pm$ 0.05  | 10.09 $\pm$ 0.70 |
| <b>45-30</b> | 22.03 $\pm$ 1.70 | 66.93 $\pm$ 2.67 | 0.32 $\pm$ 0.11  | 10.72 $\pm$ 1.24 |



**Table S8.** Relative rRNA abundances of major eukaryal groups in total SSU rRNA reads.

|              | Archaeplastida | Opisthokonta<br>/fungi | Excavata  | SAR       | Incertae<br>Sedis | Amoebozoa |
|--------------|----------------|------------------------|-----------|-----------|-------------------|-----------|
| <b>30-5</b>  | 0.15±0.02      | 0.12±0.03              | 0.01      | 0.13±0.01 | 0.00              | 0.64±0.06 |
| <b>30-11</b> | 0.2±0.02       | 0.18±0.03              | 0.08±0.04 | 0.27±0.04 | 0.09±0.04         | 0.89±0.11 |
| <b>30-16</b> | 0.19           | 0.20±0.01              | 0.13±0.05 | 0.38±0.03 | 0.41±0.08         | 0.97±0.04 |
| <b>30-23</b> | 0.19±0.02      | 0.28±0.02              | 0.30±0.02 | 0.65±0.05 | 0.60±0.13         | 1.14±0.07 |
| <b>30-30</b> | 0.23±0.01      | 0.37±0.02              | 0.25±0.03 | 0.72±0.18 | 0.38±0.08         | 1.46±0.06 |
| <b>45-5</b>  | 0.02±0.02      | 0.04±0.02              | 0.00      | 0.02±0.01 | 0.00              | 0.39±0.17 |
| <b>45-11</b> | 0.02±0.02      | 0.08±0.01              | 0.00      | 0.02±0.01 | 0.00              | 0.82±0.18 |
| <b>45-16</b> | 0.01±0.01      | 0.08±0.03              | 0.00      | 0.02±0.01 | 0.00              | 0.59±0.23 |
| <b>45-23</b> | 0.00           | 0.03±0.01              | 0.00      | 0.01      | 0.00              | 0.24±0.04 |
| <b>45-30</b> | 0.01±0.01      | 0.04±0.01              | 0.00      | 0.01      | 0.00              | 0.25±0.10 |

**Table S9.** Domain-level distribution of putative mRNA reads (means  $\pm$  SE, n=3).

|              | <b>Archaea</b>   | <b>Bacteria</b>  | <b>Eukaryota</b> | <b>Others</b>   |
|--------------|------------------|------------------|------------------|-----------------|
| <b>30-5</b>  | 4.58 $\pm$ 0.29  | 94.19 $\pm$ 0.30 | 1.14 $\pm$ 0.02  | 0.09 $\pm$ 0.01 |
| <b>30-11</b> | 34.90 $\pm$ 0.91 | 63.86 $\pm$ 0.88 | 1.17 $\pm$ 0.06  | 0.07 $\pm$ 0.00 |
| <b>30-16</b> | 25.57 $\pm$ 0.58 | 73.01 $\pm$ 0.52 | 1.38 $\pm$ 0.07  | 0.05 $\pm$ 0.01 |
| <b>30-23</b> | 27.16 $\pm$ 0.72 | 70.85 $\pm$ 0.69 | 1.93 $\pm$ 0.03  | 0.05 $\pm$ 0.00 |
| <b>30-30</b> | 22.08 $\pm$ 1.20 | 74.66 $\pm$ 0.57 | 3.20 $\pm$ 0.71  | 0.07 $\pm$ 0.01 |
| <b>45-5</b>  | 1.12 $\pm$ 0.18  | 98.17 $\pm$ 0.22 | 0.66 $\pm$ 0.06  | 0.05 $\pm$ 0.01 |
| <b>45-11</b> | 2.29 $\pm$ 0.14  | 97.24 $\pm$ 0.18 | 0.41 $\pm$ 0.03  | 0.05 $\pm$ 0.00 |
| <b>45-16</b> | 6.75 $\pm$ 1.37  | 92.69 $\pm$ 1.40 | 0.53 $\pm$ 0.04  | 0.03 $\pm$ 0.01 |
| <b>45-23</b> | 30.39 $\pm$ 4.51 | 69.17 $\pm$ 4.44 | 0.39 $\pm$ 0.08  | 0.05 $\pm$ 0.01 |
| <b>45-30</b> | 39.24 $\pm$ 7.09 | 60.18 $\pm$ 7.03 | 0.54 $\pm$ 0.05  | 0.04 $\pm$ 0.00 |

**Table S10.** Sequencing statistics of putative mRNA (only bacteria and archaea) in metatranscriptomic datasets.

|                | Reads assigned to mRNA | % processed reads <sup>1</sup> | Reads with NCBI nr hit <sup>2</sup> | % assigned <sup>3</sup> | Phylum         | % assigned <sup>4</sup> | Family         | % assigned <sup>5</sup> | SEED           | % assigned <sup>6</sup> | KEGG           | % assigned <sup>7</sup> | CAZy <sup>8</sup> | % assigned <sup>8</sup> |
|----------------|------------------------|--------------------------------|-------------------------------------|-------------------------|----------------|-------------------------|----------------|-------------------------|----------------|-------------------------|----------------|-------------------------|-------------------|-------------------------|
| <b>30-5-1</b>  | 53,939                 | 1.89                           | 24,324                              | 45.10                   | 19,310         | 79.39                   | 11,366         | 46.73                   | 10,657         | 43.81                   | 10,728         | 44.10                   | 1,999             | 8.22                    |
| <b>30-5-2</b>  | 48,484                 | 1.90                           | 19,491                              | 40.20                   | 15,661         | 80.35                   | 9,361          | 48.03                   | 8,038          | 41.24                   | 8,127          | 41.70                   | 1,458             | 7.48                    |
| <b>30-5-3</b>  | 57,434                 | 1.88                           | 26,211                              | 45.64                   | 21,143         | 80.66                   | 11,732         | 44.76                   | 11,404         | 43.51                   | 11,681         | 44.57                   | 2,163             | 8.25                    |
| <b>30-11-1</b> | 87,712                 | 3.1                            | 28,931                              | 32.98                   | 24,036         | 83.08                   | 16,823         | 58.15                   | 12,920         | 44.66                   | 12,932         | 44.70                   | 1,802             | 6.23                    |
| <b>30-11-2</b> | 58,168                 | 2.61                           | 21,748                              | 37.39                   | 17,657         | 81.19                   | 12,177         | 55.99                   | 9,864          | 45.36                   | 10,071         | 46.31                   | 1,508             | 6.93                    |
| <b>30-11-3</b> | 73,059                 | 2.68                           | 25,709                              | 35.19                   | 20,968         | 81.56                   | 14,669         | 57.06                   | 12,115         | 47.12                   | 12,186         | 47.40                   | 1,705             | 6.63                    |
| <b>30-16-1</b> | 48,789                 | 1.98                           | 20,181                              | 41.36                   | 15,914         | 78.86                   | 10,350         | 51.29                   | 8,431          | 41.78                   | 8,393          | 41.59                   | 1,338             | 6.63                    |
| <b>30-16-2</b> | 49,499                 | 1.92                           | 21,565                              | 43.57                   | 17,291         | 80.18                   | 11,135         | 51.63                   | 8,942          | 41.47                   | 8,910          | 41.32                   | 1,500             | 6.96                    |
| <b>30-16-3</b> | 50,320                 | 2.04                           | 21,382                              | 42.49                   | 17,078         | 79.87                   | 11,026         | 51.57                   | 8,871          | 41.49                   | 8,808          | 41.19                   | 1,455             | 6.80                    |
| <b>30-23-1</b> | 54,539                 | 2.25                           | 24,620                              | 45.14                   | 19,502         | 79.21                   | 12,906         | 52.42                   | 10,618         | 43.13                   | 10,396         | 42.23                   | 1,765             | 7.17                    |
| <b>30-23-2</b> | 45,537                 | 2.11                           | 20,245                              | 44.46                   | 15,908         | 78.58                   | 10,314         | 50.95                   | 8,798          | 43.46                   | 8,606          | 42.51                   | 1,500             | 7.41                    |
| <b>30-23-3</b> | 68,482                 | 2.13                           | 28,848                              | 42.12                   | 22,763         | 78.91                   | 14,938         | 51.78                   | 12,291         | 42.61                   | 11,977         | 41.52                   | 2,011             | 6.97                    |
| <b>30-30-1</b> | 55,006                 | 2.36                           | 17,739                              | 32.25                   | 14,243         | 80.29                   | 9,101          | 51.31                   | 6,239          | 35.17                   | 5,642          | 31.81                   | 1,256             | 7.08                    |
| <b>30-30-2</b> | 51,478                 | 2.38                           | 15,527                              | 30.16                   | 12,518         | 80.62                   | 8,096          | 52.14                   | 5,453          | 35.12                   | 5,018          | 32.32                   | 1,072             | 6.90                    |
| <b>30-30-3</b> | 65,150                 | 2.3                            | 21,812                              | 33.48                   | 17,468         | 80.08                   | 11,322         | 51.91                   | 7,715          | 35.37                   | 7,397          | 33.91                   | 1,591             | 7.29                    |
| <b>45-5-1</b>  | 24,001                 | 1.07                           | 15,010                              | 62.54                   | 12,011         | 80.02                   | 6,321          | 42.11                   | 7,051          | 46.98                   | 7,341          | 48.91                   | 1,475             | 9.83                    |
| <b>45-5-2</b>  | 21,538                 | 0.82                           | 14,196                              | 65.91                   | 11,419         | 80.44                   | 5,889          | 41.48                   | 6,762          | 47.63                   | 7,106          | 50.06                   | 1,249             | 8.80                    |
| <b>45-5-3</b>  | 32,222                 | 1.46                           | 19,959                              | 61.94                   | 15,883         | 79.58                   | 8,537          | 42.77                   | 9,266          | 46.43                   | 9,916          | 49.68                   | 1,910             | 9.57                    |
| <b>45-11-1</b> | 99,274                 | 4.51                           | 63,444                              | 63.91                   | 45,151         | 71.17                   | 20,123         | 31.72                   | 31,797         | 50.12                   | 34,260         | 54.00                   | 5,524             | 8.71                    |
| <b>45-11-2</b> | 88,774                 | 3.95                           | 57,655                              | 64.95                   | 41,639         | 72.22                   | 18,670         | 32.38                   | 27,323         | 47.39                   | 31,482         | 54.60                   | 5,183             | 8.99                    |
| <b>45-11-3</b> | 129,971                | 5.07                           | 84,736                              | 65.20                   | 59,414         | 70.12                   | 26,182         | 30.90                   | 42,826         | 50.54                   | 46,159         | 54.47                   | 7,316             | 8.63                    |
| <b>45-16-1</b> | 95,866                 | 3.00                           | 61,707                              | 64.37                   | 46,921         | 76.04                   | 23,744         | 38.48                   | 30,685         | 49.73                   | 32,678         | 52.96                   | 5,871             | 9.51                    |
| <b>45-16-2</b> | 44,859                 | 1.91                           | 28,234                              | 62.94                   | 22,048         | 78.09                   | 12,038         | 42.64                   | 13,778         | 48.80                   | 14,551         | 51.54                   | 2,326             | 8.24                    |
| <b>45-16-3</b> | 72,139                 | 2.86                           | 47,212                              | 65.45                   | 35,323         | 74.82                   | 17,636         | 37.35                   | 23,736         | 50.28                   | 25,511         | 54.03                   | 4,244             | 8.99                    |
| <b>45-23-1</b> | 92,622                 | 3.74                           | 66,448                              | 71.74                   | 55,862         | 84.07                   | 37,120         | 55.86                   | 34,056         | 51.25                   | 37,743         | 56.80                   | 3,825             | 5.76                    |
| <b>45-23-2</b> | 132,638                | 4.32                           | 94,398                              | 71.17                   | 78,572         | 83.23                   | 50,035         | 53.00                   | 47,836         | 50.67                   | 52,194         | 55.29                   | 6,834             | 7.24                    |
| <b>45-23-3</b> | 107,858                | 3.76                           | 68,742                              | 63.73                   | 53,853         | 78.34                   | 32,636         | 47.48                   | 34,756         | 50.56                   | 38,932         | 56.63                   | 4,525             | 6.58                    |
| <b>45-30-1</b> | 135,018                | 5.58                           | 89,946                              | 66.62                   | 77,524         | 86.19                   | 55,865         | 62.11                   | 41,977         | 46.67                   | 47,204         | 52.48                   | 5,547             | 6.17                    |
| <b>45-30-2</b> | 158,157                | 4.88                           | 99,590                              | 62.97                   | 79,802         | 80.13                   | 51,512         | 51.72                   | 47,155         | 47.35                   | 50,751         | 50.96                   | 6,947             | 6.98                    |
| <b>45-30-3</b> | 142,716                | 5.54                           | 93,321                              | 65.39                   | 79,046         | 84.70                   | 53,955         | 57.82                   | 45,127         | 48.36                   | 50,298         | 53.90                   | 5,609             | 6.01                    |
| <b>Total</b>   | <b>2,245,249</b>       |                                | <b>1,242,931</b>                    |                         | <b>985,928</b> |                         | <b>595,579</b> |                         | <b>586,487</b> |                         | <b>626,998</b> |                         | <b>92,508</b>     |                         |

<sup>1</sup> Percentage of putative mRNA reads in processed reads calculated by eliminating rRNA and non-coding small RNA reads via SORTMERA 2.0.

<sup>2</sup> Total numbers of mRNA reads that had a homolog in NCBI nr database using BLASTx (e-value cutoff of 1e-5). mRNA reads with NCBI nr hits were subjected to taxonomic assignment and functional annotation.

<sup>3</sup> Total percentage of mRNA reads with NCBI nr hit in processed mRNA reads.

<sup>4,5</sup> Total percentage of bacterial and archaeal mRNA reads that could be assigned on phylum and family levels.

<sup>6,7</sup> Among mRNA reads with NCBI nr hit, the percentage of bacterial and archaeal mRNA reads that could be functionally annotated on SEED subsystems level 1 and KEGG categories using MEGAN6.

<sup>8</sup> Total percentage of genes that could be functionally annotated to dbCAN database

## References

1. Wegner CE, Liesack W. Microbial community dynamics during the early stages of plant polymer breakdown in paddy soil. *Environ Microbiol.* 2016;18(9):2825-2842.
2. Suzek BE, Wang YQ, Huang HZ, McGarvey PB, Wu CH, Consortium U. UniRef clusters: a comprehensive and scalable alternative for improving sequence similarity searches. *Bioinformatics.* 2015;31(6):926-932.
