# Supplementary material for: Metatranscriptomics reveals a differential temperature effect on the structural and functional organization of the anaerobic food web in rice field soil
Source: PubMed Central journal article supplement (PMC6147125; doi:10.1186/s40168-018-0546-9), 2018-09-19
Supplement: 40168_2018_546_MOESM3_ESM.pdf [file 40168_2018_546_MOESM3_ESM.pdf]

1

2

**Metatranscriptomics reveals a differential temperature effect on the  
structural and functional organization of the anaerobic food web  
in rice field soil**

4

5

6

Jingjing Peng<sup>1</sup>, Carl-Eric Wegner<sup>2</sup>, Qicheng Bei<sup>1</sup>, Pengfei Liu<sup>1</sup>, Werner Liesack<sup>1</sup>

7

8

9

10

**Supporting information:**

11

**Anaerobic breakdown of complex plant polymers**

## 12 *Anaerobic breakdown of complex plant polymers*

13 Although the CAZy database (<http://www.cazy.org>; [1]) is an invaluable resource, it suffers  
14 from two major shortcomings in that the underlying sequence information and respective  
15 CAZyme family definitions are not easily accessible. The usage of dbCAN as complementary  
16 resource allowed us to bypass these problems and to make use of available CAZy to enzyme  
17 commission (EC) number mappings to define functional modules that comprise enzyme functions  
18 of interest. Here the method-inherent limitation is that the same EC number can be linked to  
19 multiple but similar functions. We accepted this shortcoming, given that CAZyme annotations  
20 are generally prone to some noise due to both modularity of CAZymes and in part broad substrate  
21 ranges. CAZyme modularity often relates to glycosyl hydrolase (GH) modules being combined  
22 with carbohydrate-binding modules (CBM), which are mostly coexpressed. Available CAZyme  
23 to EC mappings compensated for this modularity and allowed us to confidently annotate CBM-  
24 affiliated mRNA reads to enzyme functions of associated GH domains.

25 To identify microbial groups and key enzymes involved in polymer breakdown in rice field  
26 soil, we surveyed our mRNA datasets against dbCAN. The heterogenous composition of rice  
27 straw as a complex biopolymer (cellulose 32-37%, hemicellulose 29-37%, and lignin 5-15% [2,  
28 3]) was well reflected by the CAZyme expression profiles. Totally, 92,508 mRNA reads were  
29 identified to encode CAZymes. Of these, 75,438 reads were assigned to enzyme functions related  
30 to the degradation of cellulose, xylan, other hemicelluloses, and chitin. These were primarily GHs  
31 and CBMs (GH/CBM) (Figure 3).

32 Both cellulose and xylan are not only the most abundant polysaccharides on earth, but also the  
33 main components of rice straw [4, 5] with xylan being the main constituent of hemicellulose.  
34 Correspondingly, transcripts involved in degrading cellulose, xylan, and other hemicelluloses

35 collectively contributed most to our CAZyme-affiliated mRNA reads. Pectin is only a minor  
36 component (2-3%) of rice straw [6] and mRNA reads related to its degradation accounted for <  
37 1% of total GH/CBM transcripts. By contrast, GH/CBM transcripts related to chitin degradation  
38 made - for a particular polymer – the greatest contribution to our CAZyme-affiliated mRNA reads  
39 (Additional file 1: Tables S3 and S4). This was unexpected given that chitin was present only in  
40 minor amounts. The overrepresentation of chitinase transcripts among the CAZyme-affiliated  
41 mRNA may have several reasons as discussed below.

42 On phylum level, the assignment rate of GH/CBM transcripts for each of the sampling time  
43 points (both 30°C and 45°C) was always greater than 94% (Additional file 1: Table S3). The vast  
44 majority of GH/CBM transcripts was affiliated to *Firmicutes*, in particular at 45°C (Fig. 3a). Both  
45 temperature and incubation time had a significant impact on the taxonomic composition of the  
46 GH/CBM transcript pool. At 30°C, the *Firmicutes* abundance steadily decreased till day 30,  
47 while that of the *Proteobacteria*, *Planctomycetes*, *Bacteroidetes*, and *Ignavibacteriae* collectively  
48 increased. Members of these phyla are involved in polymer breakdown [7, 8]. In particular,  
49 *Bacteroidetes* are well known for their important role in polymer degradation [9]. Relative to  
50 their contribution to total bacterial mRNA, non-*Firmicutes* populations were overrepresented in the  
51 GH/CBM transcript pool (21.5% to 37.2% [total bacterial mRNA] compared to 18.5% to 74.6%  
52 [bacterial GH/CBM transcripts]). This is most evident for the phylum *Bacteroidetes* that after  
53 *Firmicutes*, contributed second most to the bacterial GH/CBM transcript pool (Fig. 3a).  
54 Conclusively, the degradation of rice straw at 30°C involves a complex functional interaction of  
55 diverse bacterial taxa, in which the contribution of non-*Firmicutes* populations strongly increases  
56 with incubation time. By contrast, at 45°C, *Firmicutes* was the dominant taxon throughout  
57 incubation time, in good correspondence to its contribution to total bacterial mRNA (Fig. 3a and  
58 Additional file 1: Figures S4, S5).

59 On family level, the assignment rate of GH/CBM transcripts depended on polymer, sampling  
60 time point and temperature, and varied between 57% and 89% (Additional file 1: Table S3). The  
61 taxonomic composition of the GH/CBM transcripts greatly differed for each of the polymers  
62 between 30°C and 45°C (Additional file 1: Fig. S5). Unexpectedly, at 30°C, methanogens of the  
63 families *Methanosarcinaeae* and, to lower extent, *Methanoregulaceae* contributed to the  
64 GH/CBM transcripts pools of all the polymers, but most pronounced to cellulose degradation. No  
65 or only minor amounts of methanosarcinal GH/CBM transcripts were detected at 45°C. GH/CBM  
66 transcripts affiliated with methanogens at 45°C were primarily related to the *Methanocellaceae*.  
67 Members of this family made a major contribution to the GH/CBM transcripts involved in  
68 degrading cellulose and “other hemicelluloses” on day 30 (Additional file 1, Fig. S5a,b). Our  
69 study is the first report of a potential contribution of methanogens to polymer hydrolysis, while  
70 the expression of glycosyl transferases by methanogens is well confirmed [10]. In fact, there  
71 exists no published evidence for the potential of methanogens to express GHs involved in the  
72 degradation of cellulase, xylan, or other hemicelluloses. Therefore, we collected all the available  
73 complete methanogen genome sequences from NCBI RefSeq and queried them against dbCAN  
74 using DIAMOND, applying an e-value threshold of 1e-3. The 88 methanogen genomes  
75 comprised 214,249 coding sequences, of which 13,975 had a hit in dbCAN (6.5%). A total of  
76 2691 sequences (1.3%) showed hits for GHs. The dbCAN consortium recently made a webserver  
77 available that facilitates CAZyme sequence annotation. An e-value threshold of 1e-102 is  
78 suggested for DIAMOND-based querying. Applying this very stringent threshold and making a  
79 100% sequence identity mandatory reduces the number of hits against GHs to 0.14% of total  
80 methanogen genes. These high-quality hits included GH families 113, 13, 130, 133, 15, 16, 18,  
81 23, 26, 38, 39, 46, 57, and 77. Some of these GH families are linked to complex polysaccharide  
82 cleavage; for instance GH18, 23 and 46 with chitin turnover, and GH26 and 39 with xylan

83 breakdown. Hits for cellulases and related endo-glucanases mostly showed sequence identities  
84 below 100% (see Additional File 2). Taken together, the functional annotation of  
85 methanosarcinal mRNA transcripts as encoding extracellular GHs involved in polymer  
86 hydrolysis has to be interpreted with caution, but calls for further research.

87 Among *Firmicutes*, various family-level groups contributed to the decomposition of rice straw  
88 at both 30°C and 45°C: *Clostridiaceae*, *Ruminococcaceae*, *Lachnospiraceae*, *Bacillaceae*,  
89 *Paenibacillaceae*, *Symbiobacteriaceae*, and *Peptococcaceae* (Additional file 1: Fig. S5). Previous  
90 studies have shown that members of these families are involved in degrading cellulose, xylan,  
91 other hemicelluloses, and chitin (e.g., [11, 12]). Key enzymes involved rice straw degradation are  
92 cellulase, endo-1,4-beta-xylanase, and alpha- and beta-galactosidases. Four family-level groups  
93 were detected to contribute to the production of all the key enzymes, with transcripts affiliated to  
94 *Methanosarcinaceae* being predominant at 30°C, and *Clostridiaceae*, *Ruminococcaceae*, and  
95 *Paenibacillaceae* being most abundant in the GH/CBM transcript pool at 45°C. Transcripts  
96 affiliated with *Methanosarcinaceae* were overrepresented in the family-level patterns at 30°C.  
97 This is due to the fact that most of the GH/CBM transcripts affiliated with the *Proteobacteria*,  
98 *Planctomycetes*, *Bacteroidetes*, and *Ignavibacteriae* could not be assigned on family level or the  
99 families were below the abundance threshold (<0.5%).

100 Cellulase is the key enzyme in cellulose degradation. It catalyzes the first step in cellulose  
101 hydrolysis that involves the splitting of cross-links between glucan chains by endoglucanases.  
102 Cellulase transcripts were highly abundant, followed by those encoding cellulose 1,4-beta-  
103 cellobiosidase. Both transcript species showed the same abundance dynamics over time. These  
104 differed between 30°C and 45°C. Their relative abundance did not majorly change between days  
105 5 and 30 at 30°C, but showed a peak abundance on day 16 at 45°C (Fig. 3b). Cellobiose is the

106 major product of cellulose degradation. Notably, the transcripts encoding cellobiose  
107 phosphorylase were more abundant at 45°C than at 30°C throughout incubation time (Fig. 3b).  
108 This enzyme catalyzes the reversible phosphate-dependent hydrolysis of cellobiose. It was shown  
109 to exhibit a higher activity at 50°C than below 40°C [13] and to be widely distributed among the  
110 *Clostridia*, such as *Clostridium stercorarium* [14] and *Ruminococcus flavefaciens* [13].

111 Xylan is known to have a strong affinity to cellulose [15]. Its strong adsorption to cellulose is  
112 believed to act as the limiting factor in the enzymatic hydrolysis of cellulose [16]. The abundance  
113 dynamics of cellulase and endo-1,4-beta-xylanase transcripts were nearly identical, suggesting  
114 that the degradation of cellulose and xylan was highly interrelated (Fig. 3b). This is most obvious  
115 for 45°C. A coordinated degradation activity is further evidenced by the highly similar taxonomic  
116 patterns observed for cellulase and endo-1,4-beta-xylanase transcripts over time, with a peak  
117 abundance of the *Clostridicaceae* and *Ruminococcaceae* collectively on day 16. In addition to  
118 endo-1,4-beta-xylanase, the abundance dynamics of transcripts encoding acetylxylan esterase  
119 differed between 30°C and 45°C, with much higher relative transcript levels at 30°C. Thus,  
120 temperature had a determinative effect on the transcript levels of particular GHs. It has been  
121 shown that the addition of xylanases and acetylxylan esterases significantly improves the  
122 performance of cellulase, with an increase in cellulose conversion in many lignocellulosic  
123 materials [17, 18]. In our study, the interrelation between cellulolytic and xylanolytic transcript  
124 dynamics was evident for both temperatures, but in particular for 45°C.

125 In addition to xylan, hemicelluloses include xyloglucans, mannans and glucomannans, and  $\beta$ -  
126 (1→3, 1→4) – glucans [5]. Alpha- and beta-galactosidases are the two most abundant  
127 hemicellulose-degrading enzymes. Their transcript dynamics clearly differed between 30°C and  
128 45°C. At 30°C, the alpha-galactosidase transcripts showed a significantly greater abundance

129 throughout incubation than those encoding beta-galactosidase. However, at 45°C, the transcript  
130 abundances showed the opposite trend during the later incubation stages. These temperature-  
131 dependent differences in relative transcript levels presumably relate to the microorganisms  
132 involved in hemicellulose degradation. In fact, four family-level groups that greatly contributed  
133 to the production of alpha- and beta-galactosidases – *Symbiobacteriaceae*, *Methanosarcinaceae*,  
134 *Peptococcaceae*, and *Ruminococcaceae* - varied in their abundance as a function of enzyme type,  
135 temperature, and incubation time (Additional file 1: Fig. S5c). Intriguingly, the  
136 *Symbiobacteriaceae* made a major contribution to the pool of GH transcripts encoding alpha-  
137 galactosidase, but not to any of the other key enzymes (Additional file 1: Fig. S5c). The ability to  
138 produce alpha-galactosidase appears to be an adaptive trait of particular *Symbiobacterium* spp.  
139 Isolated from compost, the thermophilic nonspore-forming species *Symbiobacterium toebii* was  
140 shown to produce alpha-galactosidase, but not beta-galactosidase [19]. Other *Symbiobacterium*  
141 spp., however, are negative for both alpha-galactosidase and beta-galactosidase, such as *S.*  
142 *ostreiconchae*, *S. turbinis*, and *S. terraclitae* [20].

143 Chitinase transcripts were the most abundant individual type of GHs, with relatively stable  
144 mRNA abundances throughout incubation at both 30°C and 45°C. Other genes known to be  
145 involved in chitinase degradation, such as N-acetylglucosaminidase, chitin-deacetylase, N-  
146 acetylglucosaminyolphosphatidylinositol deacetylase, were expressed only on a very low level  
147 (Fig. 3b). A large proportion of chitinase transcripts was affiliated with the *Clostridiaceae*  
148 (Additional file 1: Fig. S5a,b). A recent whole-genome transcriptome study on a plant litter-  
149 degrading *Clostridium* species has shown that chitinase transcripts are highly expressed during  
150 cellulolytic breakdown [21]. One may speculate that CAZymes annotated as chitinases are  
151 involved in degrading cellulose due to cross-substrate specificity. The cellular coexpression of  
152 cellulases and chitinases may be a phenomenon that is widely distributed not only among

153 *Clostridia*, but also among other microbial groups. In our study, it would explain why chitinase  
154 transcripts exhibit a stable and consistently high abundance during plant polymer breakdown.

155

## 156 References

- 157 1. Lombard V, Ramulu HG, Drula E, Coutinho PM, Henrissat B. The carbohydrate-active enzymes  
158 database (CAZy) in 2013. *Nucleic Acids Res.* 2014;42(D1):490-495.
- 159 2. Tsutsuki K, Ponnampereuma FN. Behavior of anaerobic decomposition products in submerged  
160 soils - effects of organic material amendment, soil properties, and temperature. *Soil Sci Plant Nutr.*  
161 1987;33(1):13-33.
- 162 3. Watanabe A, Katoh K, Kimura M. Effect of rice straw application on CH<sub>4</sub> emission from paddy  
163 fields. II. Contribution of organic constituents in rice straw. *Soil Sci Plant Nutr.* 1993;39(4):707-  
164 712.
- 165 4. Podkaminer KK, Guss AM, Trajano HL, Hogsett DA, Lynd LR. Characterization of xylan  
166 utilization and discovery of a new endoxylanase in *Thermoanaerobacterium saccharolyticum*  
167 through targeted gene deletions. *Appl Environ Microbiol.* 2012;78(23):8441-8447.
- 168 5. Scheller HV, Ulvskov P. Hemicelluloses. *Annu Rev Plant Biol.* 2010;61:263-289.
- 169 6. Zhao JS, Fu CG, Yang ZY. Integrated process for isolation and complete utilization of rice straw  
170 components through sequential treatment. *Chem Eng Commun.* 2008;195(9):1176-1183.
- 171 7. Ivanova AA, Wegner CE, Kim Y, Liesack W, Dedysh SN. Identification of microbial populations  
172 driving biopolymer degradation in acidic peatlands by metatranscriptomic analysis. *Mol Ecol.*  
173 2016;25(19):4818-4835.
- 174 8. Kadnikov VV, Mardanov AV, Podosokorskaya OA, Gavrilov SN, Kublanov IV, Beletsky AV,  
175 Bonch-Osmolovskaya EA, Ravin NV. Genomic analysis of *Melioribacter roseus*, facultatively  
176 anaerobic organotrophic bacterium representing a novel deep lineage within  
177 *Bacteroidetes/Chlorobi* group. *PLoS ONE.* 2013;8(1).
- 178 9. Thomas F, Hehemann JH, Rebuffet E, Czjzek M, Michel G. Environmental and gut *Bacteroidetes*:  
179 the food connection. *Front Microbiol.* 2011;2.



- 180 10. Magidovich H, Eichler J. Glycosyltransferases and oligosaccharyltransferases in Archaea:  
181 putative components of the N-glycosylation pathway in the third domain of life. FEMS Microbiol  
182 Lett. 2009;300(1):122-130.
- 183 11. Bandounas L, Wierckx NJP, de Winde JH, Ruijsenaars HJ. Isolation and characterization of  
184 novel bacterial strains exhibiting ligninolytic potential. BMC Biotechnol. 2011;11.
- 185 12. Wang YX, Liu Q, Yan L, Gao YM, Wang YJ, Wang WD. A novel lignin degradation bacterial  
186 consortium for efficient pulping. Bioresource Technol. 2013;139:113-119.
- 187 13. Hamura K, Saburi W, Abe S, Morimoto N, Taguchi H, Mori H, Matsui H. Enzymatic  
188 characteristics of cellobiose phosphorylase from *Ruminococcus albus* NE1 and kinetic mechanism  
189 of unusual substrate inhibition in reverse phosphorolysis. Biosci Biotech Bioch. 2012;76(4):812-  
190 818.
- 191 14. Reichenbecher M, Lottspeich F, Bronnenmeier K. Purification and properties of a cellobiose  
192 phosphorylase (CepA) and a cellodextrin phosphorylase (CepB) from the cellulolytic thermophile  
193 *Clostridium stercorarium*. Eur J Biochem. 1997;247(1):262-267.
- 194 15. Simmons TJ, Mortimer JC, Bernardinelli OD, Poppler AC, Brown SP, Deazevedo ER, Dupree R,  
195 Dupree P. Folding of xylan onto cellulose fibrils in plant cell walls revealed by solid-state NMR.  
196 Nat Commun. 2016;7.
- 197 16. Penttila PA, Varnai A, Pere J, Tammelin T, Salmen L, Siika-aho M, Viikari L, Serimaa R. Xylan  
198 as limiting factor in enzymatic hydrolysis of nanocellulose. Bioresource Technol. 2013;129:135-  
199 141.
- 200 17. Garcia-Aparicio MP, Ballesteros M, Manzanares P, Ballesteros I, Gonzalez A, Negro MJ.  
201 Xylanase contribution to the efficiency of cellulose enzymatic hydrolysis of barley straw. Appl  
202 Biochem Biotech. 2007;137:353-365.
- 203 18. Zhang JH, Siika-aho M, Tenkanen M, Viikari L. The role of acetyl xylan esterase in the  
204 solubilization of xylan and enzymatic hydrolysis of wheat straw and giant reed. Biotechnol  
205 Biofuels. 2011;4.
- 206 19. Sung MH, Bae JW, Kim JJ, Kim K, Song JJ, Rhee SK, Jeon CO, Choi YH, Hong SP, Lee SG, Ha  
207 JS, Kang GT. *Symbiobacterium toebii* sp nov., commensal thermophile isolated from Korean  
208 compost. J Microbiol Biotechn. 2003;13(6):1013-1017.
- 209 20. Shiratori-Takano H, Akita K, Yamada K, Itoh T, Sugihara T, Beppu T, Ueda K. Description of  
210 *Symbiobacterium ostreiconchae* sp nov., *Symbiobacterium turbinis* sp nov and *Symbiobacterium*

211 *terraclitae* sp nov., isolated from shellfish, emended description of the genus *Symbiobacterium*  
212 and proposal of *Symbiobacteriaceae* fam. nov. Int J Syst Evol Micr. 2014;64:3375-3383.

213 21. Tolonen AC, Cerisy T, El-Sayyed H, Boutard M, Salanoubat M, Church GM. Fungal lysis by a  
214 soil bacterium fermenting cellulose. Environ Microbiol. 2015;17(8):2618-2627.

215
